# Supplementary material for: Interactive Aerosol Feedbacks on Photolysis Rates in the GEM-MACH v2.4 Air Quality Model in Canadian Urban and Industrial Areas
Source: Copernicus journal article supplement (doi:10.5194/gmd-2021-172), 2021-07-08
Supplement: Supplementary file [file gmd-2021-172-AC1-supplement.pdf]

| <b>Aerosol</b>          | <b>Density(kg m<sup>-3</sup>)</b> | <b>Real part of the refractive index at 550 nm (at RH= 0% )</b> | <b>Imaginary part of the refractive index at 550 nm (at RH= 0% )</b> |
|-------------------------|-----------------------------------|-----------------------------------------------------------------|----------------------------------------------------------------------|
| <b>Ammonium sulfate</b> | $1.77 \times 10^{+3}$             | 1.53                                                            | $10^{-7}$                                                            |
| <b>Ammonium nitrate</b> | $1.7 \times 10^{+3}$              | 1.56                                                            | $10^{-9}$                                                            |
| <b>Dust</b>             | $2.56 \times 10^{+3}$             | 1.56                                                            | $6 \times 10^{-3}$                                                   |
| <b>Black carbon</b>     | $1.8 \times 10^{+3}$              | 1.75                                                            | 0.44                                                                 |
| <b>Seasalt</b>          | $2.17 \times 10^{+3}$             | 1.49                                                            | 0.006                                                                |
| <b>Water</b>            | $1.0 \times 10^{+3}$              | 1.33                                                            | $1.00023 \times 10^{-8}$                                             |
| <b>Organics</b>         | $1.4 \times 10^{+3}$              | 1.53                                                            | $1.96 \times 10^{-9}$                                                |

**Table 2: Density and the refractive index of each aerosol type.**

|                  | Real Part of the Refractive Index | Imaginary Part of the Refractive Index | Extinction Efficiency | Scattering Efficiency | Absorption Efficiency |                                                                                      | Aerosol Component Volume Fraction |                      |                     |                     |        |
|------------------|-----------------------------------|----------------------------------------|-----------------------|-----------------------|-----------------------|--------------------------------------------------------------------------------------|-----------------------------------|----------------------|---------------------|---------------------|--------|
| H2O              | 1.34                              | $1.0 \times 10^{-9}$                   | 0.20941               | 0.20941               | 0                     |                                                                                      | 0.2                               | 0.2                  | 0.3                 | 0.1                 |        |
| Organics         | 1.45                              | $1.0 \times 10^{-3}$                   | 0.37171               | 0.36772               | 0.00399               |                                                                                      | 0.5                               | 0.3                  | 0.3                 | 0.7                 |        |
| Ammonium Sulfate | 1.52                              | $5.0 \times 10^{-4}$                   | 0.49265               | 0.4906                | 0.00205               |                                                                                      | 0.3                               | 0.5                  | 0.4                 | 0.2                 |        |
|                  |                                   |                                        |                       |                       |                       | Real Part Volume Average                                                             | 1.449                             | 1.463                | 1.445               | 1.453               |        |
|                  |                                   |                                        |                       |                       |                       | Imaginary Part Volume Average                                                        | $6.5 \times 10^{-4}$              | $5.5 \times 10^{-4}$ | $5. \times 10^{-4}$ | $8. \times 10^{-4}$ |        |
|                  |                                   |                                        |                       |                       |                       | Method 1 (volume average of refractive indices, D=0.2 $\mu$ m)                       | Extinction Efficiency             | 0.3688               | 0.3917              | 0.3618              | 0.3759 |
|                  |                                   |                                        |                       |                       |                       |                                                                                      | Scattering Efficiency             | 0.3663               | 0.3895              | 0.3598              | 0.3727 |
|                  |                                   |                                        |                       |                       |                       |                                                                                      | Absorption Efficiency             | 0.0026               | 0.0022              | 0.0020              | 0.0032 |
|                  |                                   |                                        |                       |                       |                       | Method 2 (refractive index of pure aerosol and aerosol concentration, D=0.2 $\mu$ m) | Extinction Efficiency             | 0.3755               | 0.3997              | 0.3714              | 0.3797 |
|                  |                                   |                                        |                       |                       |                       |                                                                                      | Scattering Efficiency             | 0.3729               | 0.3975              | 0.3694              | 0.3765 |
|                  |                                   |                                        |                       |                       |                       |                                                                                      | Absorption Efficiency             | 0.0026               | 0.0022              | 0.0020              | 0.0032 |
|                  |                                   |                                        |                       |                       |                       | Error                                                                                | Extinction Efficiency             | -0.018               | -0.021              | -0.026              | -0.010 |
|                  |                                   |                                        |                       |                       |                       |                                                                                      | Scattering Efficiency             | -0.018               | -0.021              | -0.027              | -0.010 |
|                  |                                   |                                        |                       |                       |                       |                                                                                      | Absorption Efficiency             | -0.008               | -0.005              | -0.008              | -0.001 |

**Table S1: Different treatments of the soluble species surrounding the black carbon core using an online Mie calculator for a particle diameter of 0.2  $\mu$ m: 1) volume averaging the refractive indices and calculating the extinction, scattering and absorption efficiency of the mixture, 2) using the optical properties of pure components and volume-weighting the pure optical properties. Three different aerosol component fractions on the right side of the table were used to generate Extinction Efficiency, Scattering Efficiency, and Absorption Efficiency; at the bottom of the table, the differences in the resulting values are examined.**

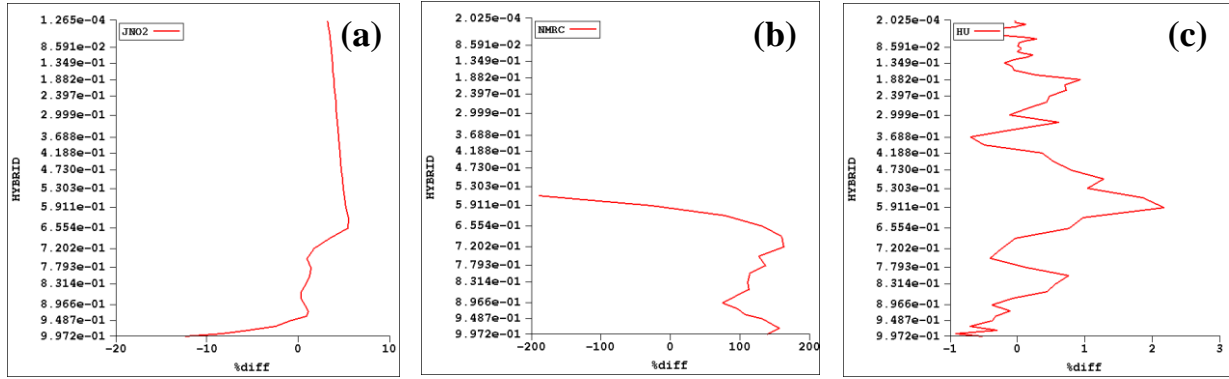

Figure S1: the percentage difference in (a) JNO<sub>2</sub>, (b) number mixing ratio of clouds (droplets) and (c) specific humidity over an area with high values of JNO<sub>2</sub> difference.

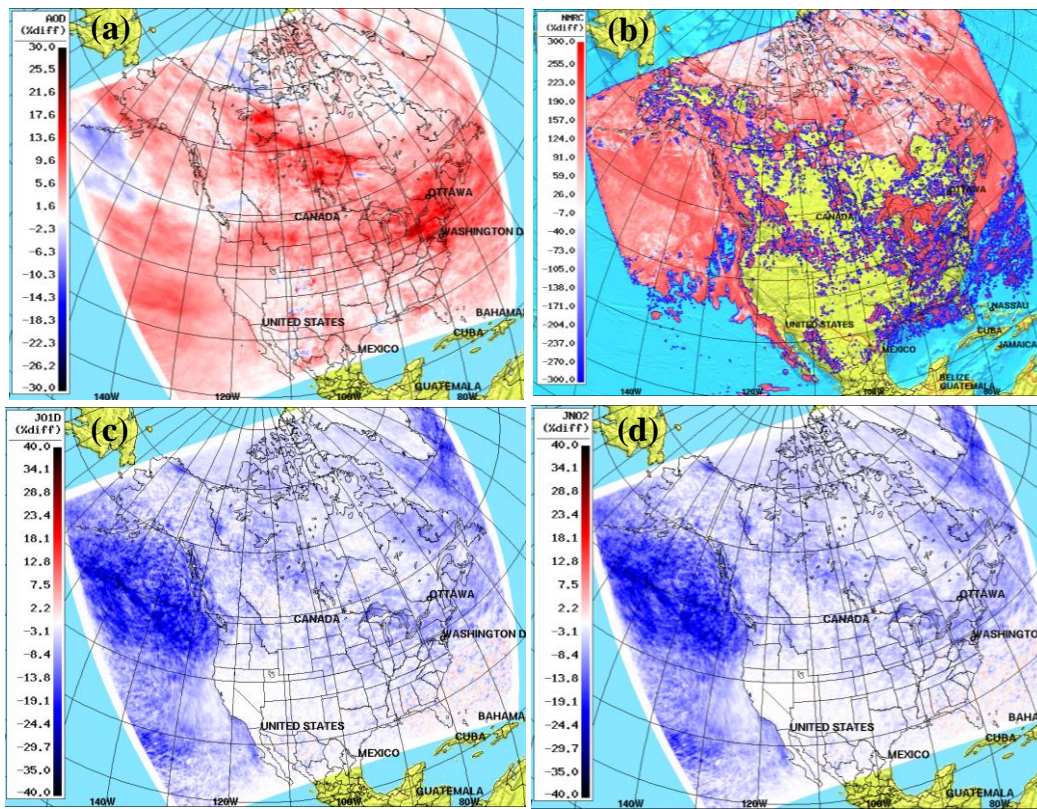

Figure 11: Percentage difference in daytime monthly average (June 2018) in (a) AOD (b) number mixing ratio of clouds at 820 hPa (~1.75 km above sea level), (c) JO<sup>1</sup>D at the lowest model level, and (d) JNO<sub>2</sub> at the lowest model level, with and without online aerosol feedbacks.

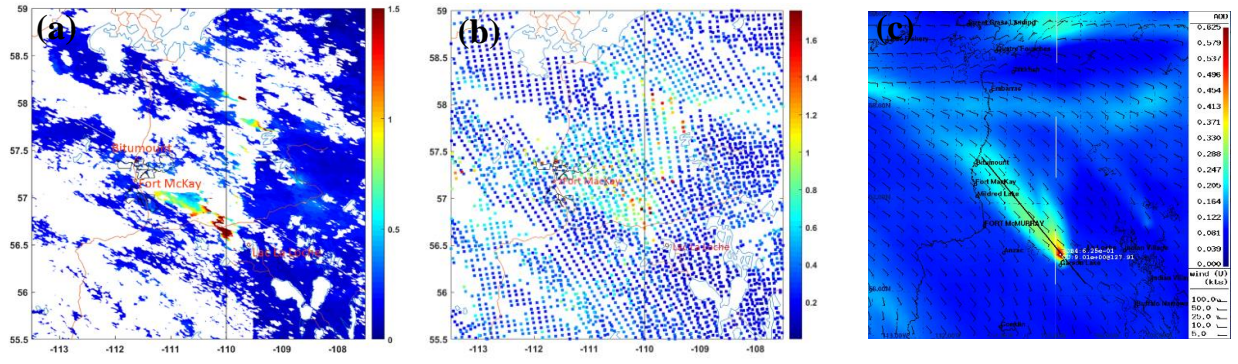

Figure 14: Lac La Loche forest fire, June 25, 2018 (a): MAIAC daily AOD at 550 nm, (b): VIIRS daily AOD at 550 nm and (c): GEM-MACH AOD at 580 nm and horizontal wind bars at 23:00 UTC. The color bar scale on VIIRS and GEM-MACH plots (b and c) show the true maximum values. The maximum AOD value in the MAIAC plot (maximum of 3) was scaled down to illustrate the fire plume. The cross sections in Fig. 15, Fig. 16 and Fig. 17 are plotted along the black line in (c).
